# Supplementary material
Source: MDPI journal article supplement (https://www.mdpi.com/2073-4395/12/7/1595)
Supplement: s1 [file s1]

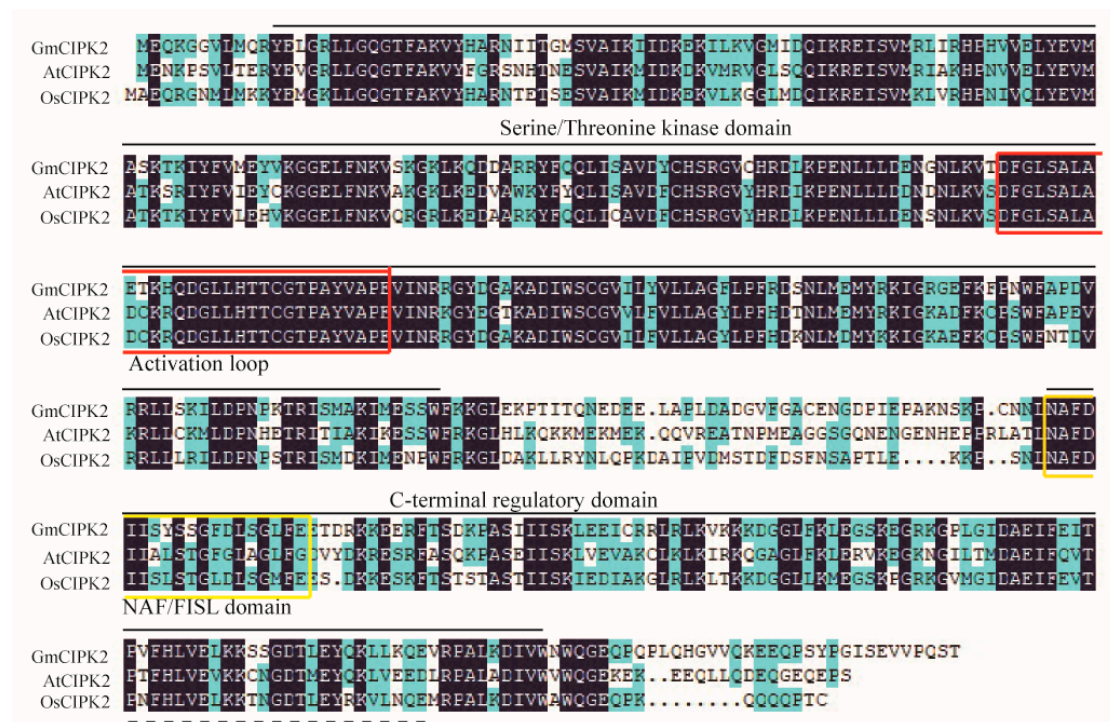

**Figure S1.** Sequence analysis of GmCIPK2. (A) Multiple sequences alignment of GmCIPK2, OsCIPK2, and AtCIPK2. Dark blue shading indicates identical residues, Dark lines demarcate the N-terminal Ser/Thr kinase domain and C-terminal regulatory domains. The NAF/FISL domain is marked with a red rectangle.

**Table S1.** Primers used in RT-PCR assays.

| <b>Gene</b>      |         | <b>Primers</b>                 |
|------------------|---------|--------------------------------|
| <i>actin</i>     | Forward | 5'- GAAATCACAGCACTTGCACC -3'   |
|                  | Reverse | 5'-TGGAATGTGCTGAGGGAAGC-3'     |
| <i>Gmtubulin</i> | Forward | 5'-GAGGCAAGATGAGCACCAAG-3'     |
|                  | Reverse | 5'-ACGGAACATTCCTGAATGGAG-3'    |
| <i>GmCIPK2</i>   | Forward | 5'- TCTCGATGCTGATGGAGTATTG -3' |
|                  | Reverse | 5'- TTGTCGGATGTAAACCGCTCT -3'  |
| <i>GmCBL4</i>    | Forward | 5'- AAGGATGGATGCTTGGACACA -3'  |
|                  | Forward | 5'- TCTCGATGCTGATGGAGTATTG -3' |
| <i>GmP5CS</i>    | Forward | 5'- GCGGATCCTTCTCGGAGTTT -3'   |
|                  | Reverse | 5'- TCAATTTGCGGTAGCGGAGT -3'   |
| <i>GmLEA5</i>    | Forward | 5'-CCGATGTATCGGTAAAGAGT-3'     |
|                  | Reverse | 5'-AGGCTTTTGAACCATCTC -3'      |
| <i>GmDHN15</i>   | Forward | 5'- GGAACATCGGTGGCCCTT-3'      |
|                  | Reverse | 5' CCAGTGCCTCCATAA-3'          |
| <i>GmMYB118</i>  | Forward | 5'- ATCATACTGTTTCGGAGTCAC-3'   |
|                  | Reverse | 5'- CAGACACTGTAGAGACCTTGTT-3'  |
| <i>GmNHX1</i>    | Forward | 5'-GTCGGGGCACACTTCACTAA-3'     |
|                  | Reverse | 5'-GGATGCTGCTTGGACGATGA-3'     |
| <i>GmSOS1</i>    | Forward | 5'- ATCGGCTGGGAAAGATTGGG -3'   |
|                  | Reverse | 5'-CACCAGGGCCAGCTAGTAAG-3'     |
| <i>GmPOD21</i>   | Forward | 5'-CCGTTTCGTGGGTCAGAAATCT-3'   |
|                  | Reverse | 5'-CCGACGCCTGCTCCGACACTA-3'    |
| <i>GmPOD47</i>   | Forward | 5'-CAGCTCTGCAGGATGATCCCA-3'    |
|                  | Reverse | 5'-TCAATCAGAACTGAACCATCA-3'    |
| <i>GmGST18</i>   | Forward | 5'-ATTGCTGCCAAAAGACAACCA-3'    |
|                  | Reverse | 5'-AAACAAATCGGTAATAGACAAT-3'   |
| <i>GmGST20</i>   | Forward | 5'-GGGTGTAGAGTATGAGTAT -3'     |
|                  | Reverse | 5'-TGAACAAGAACCGGAACCT-3'      |
